# Supplementary material for: A Novel H2O2 Generator for Tumor Chemotherapy-Enhanced CO Gas Therapy
Source: Front Oncol. 2021 Sep 21;11:738567. doi: 10.3389/fonc.2021.738567 (PMC8496405; doi:10.3389/fonc.2021.738567)
Supplement: Supplementary file 11 [file Table_1.xlsx]

## Sheet: Sheet1
		CO release (μM)
	Time (min)	ZCM	ZCM+50μm H2O2	ZCM+10μm H2O2
	0	0	0	0
	10	0.04	0.67	0.96
	20	0.08	1.11	1.58
	30	0.12	1.42	2.24
	40	0.13	1.67	2.64
	50	0.15	1.8	2.97
	60	0.17	1.92	3.22
	70	0.2	2.12	3.64
	80	0.22	2.35	3.92
	90	0.26	2.47	4.08
